# Supplementary material for: Metastable quasicrystal-induced nucleation in a bulk glass-forming liquid
Source: PubMed Central journal article supplement — Proc Natl Acad Sci U S A. 2018 May 23;115(24):6123–8. doi: 10.1073/pnas.1717941115 (PMC6004477; doi:10.1073/pnas.1717941115), 2018-05-23
Supplement: pnas.1717941115.sapp.pdf [file pnas.1717941115.sapp.pdf]

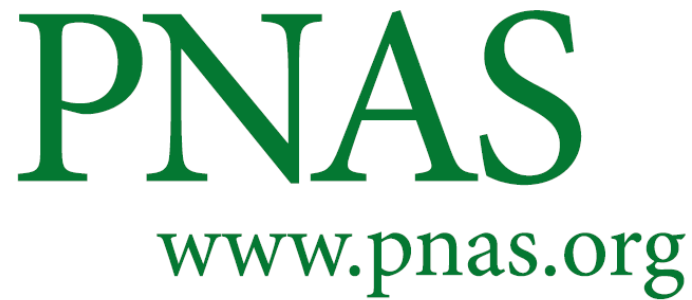

Supplementary Information for

**Metastable quasicrystal-induced nucleation in a bulk glass-forming liquid**

Güven Kurtuldu<sup>1,\*</sup>, Karl F. Shamlaye<sup>1</sup> and Jörg F. Löffler<sup>1,\*</sup>

<sup>1</sup> Laboratory of Metal Physics and Technology, Department of Materials, ETH Zurich, 8093 Zurich, Switzerland

\*Güven Kurtuldu, \*Jörg F. Löffler

Email: [guven.kurtuldu@mat.ethz.ch](mailto:guven.kurtuldu@mat.ethz.ch), [joerg.loeffler@mat.ethz.ch](mailto:joerg.loeffler@mat.ethz.ch)

**This PDF file includes:**

Figs. S1 to S6

Table S1

References for SI reference citations

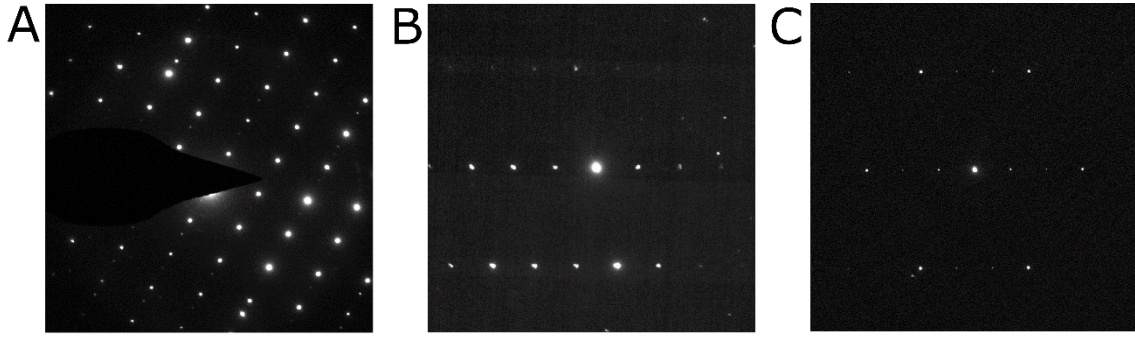

**Fig. S1.** Diffraction pattern of  $\text{Mg}_{51}\text{Zn}_{20}$ -type phase. Selected area diffraction patterns of the microstructure in as-cast  $\text{Mg}_{64}\text{Zn}_{27}\text{Yb}_9$  shown in Figure 2c along (A) [201], (B) [250] and (C) [034] zone axes of  $\text{Mg}_{51}\text{Zn}_{20}$ -type phase (orthorhombic,  $\text{Immm}$ ,  $a = 14.083 \text{ \AA}$ ,  $b = 14.486 \text{ \AA}$ ,  $c = 14.025 \text{ \AA}$ ) (1) with modified lattice parameters ( $a = 13.707 \text{ \AA}$ ,  $b = 14.819 \text{ \AA}$ ,  $c = 14.047 \text{ \AA}$ ).

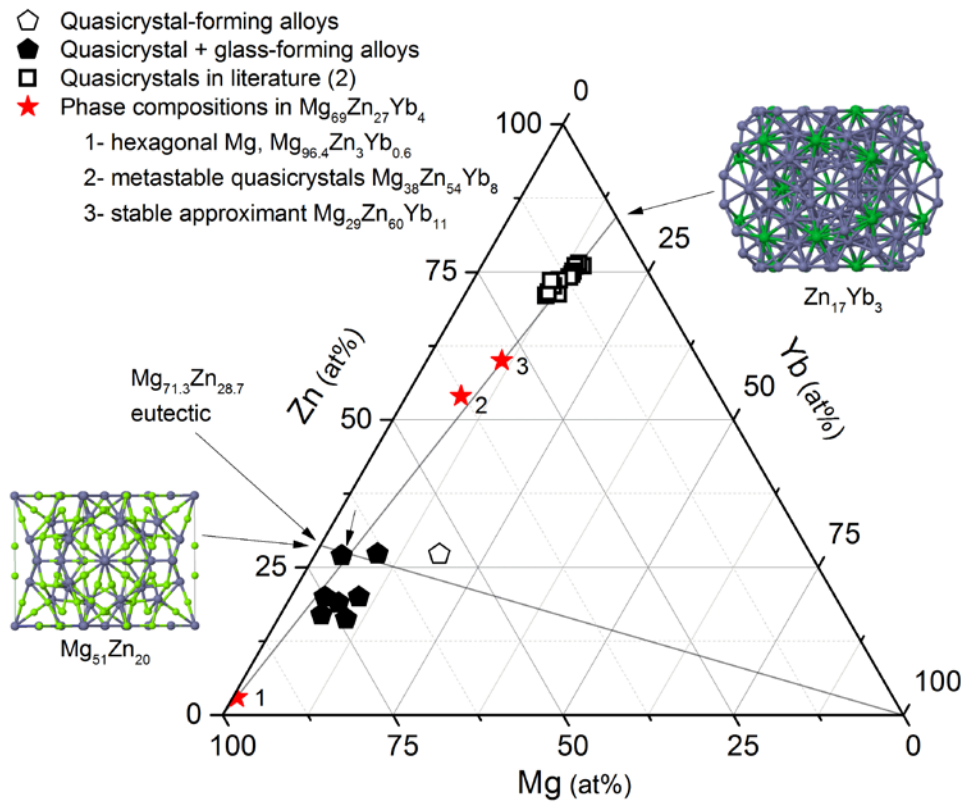

**Fig. S2.** Mg–Zn–Yb compositions. Mg–Zn–Yb ternary diagram indicating compositions for: QC and metallic glass-forming alloys found in this study; QC-forming alloys investigated by Mitani and Ishimasa (2); binary approximant phases:  $\text{Mg}_{51}\text{Zn}_{20}$  (3, 4),  $\text{Zn}_{17}\text{Yb}_3$  (5); and constructed cluster lines binding  $\text{Zn}_{17}\text{Yb}_3$  to Mg and eutectic composition  $\text{Mg}_{71.1}\text{Zn}_{28.9}$  (6) to Yb. The approximant phase  $\text{Mg}_{29}\text{Zn}_{60}\text{Yb}_{11}$  “3” and the iQC phase  $\text{Mg}_{38}\text{Zn}_{54}\text{Yb}_8$  “2” follow the cluster line between  $\text{Zn}_{17}\text{Yb}_3$  and Mg. The  $\text{Mg}_{69}\text{Zn}_{27}\text{Yb}_4$  alloy composition (see arrow) is located near the intersection of these two cluster lines and forms a BMG.

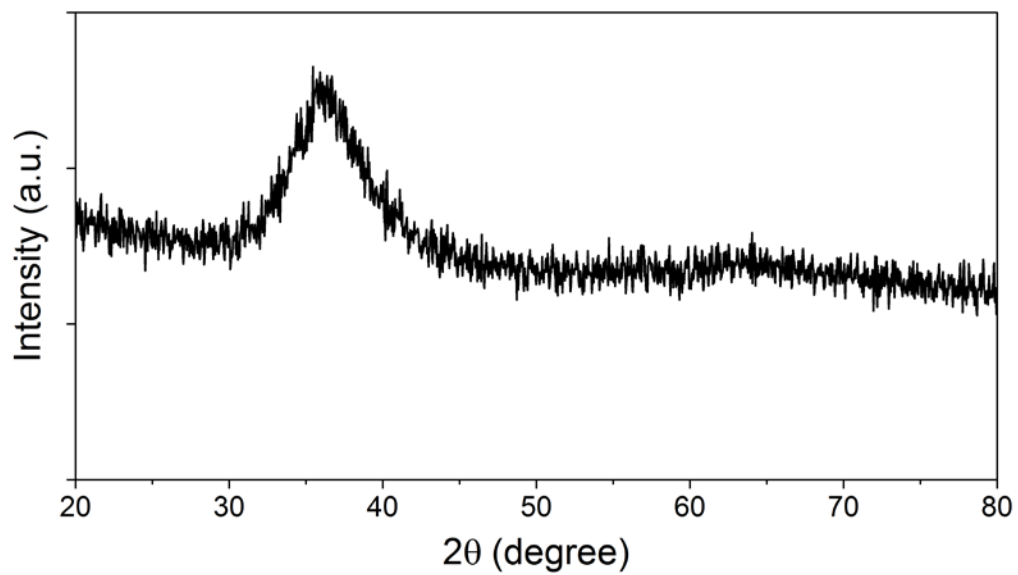

**Fig. S3.** XRD pattern of a  $\text{Mg}_{69}\text{Zn}_{27}\text{Yb}_4$  bulk metallic glass. XRD pattern taken with  $\text{Cu K}\alpha$  radiation from the cross-sectional surface of a  $\text{Mg}_{69}\text{Zn}_{27}\text{Yb}_4$  rod cast to 1 mm diameter.

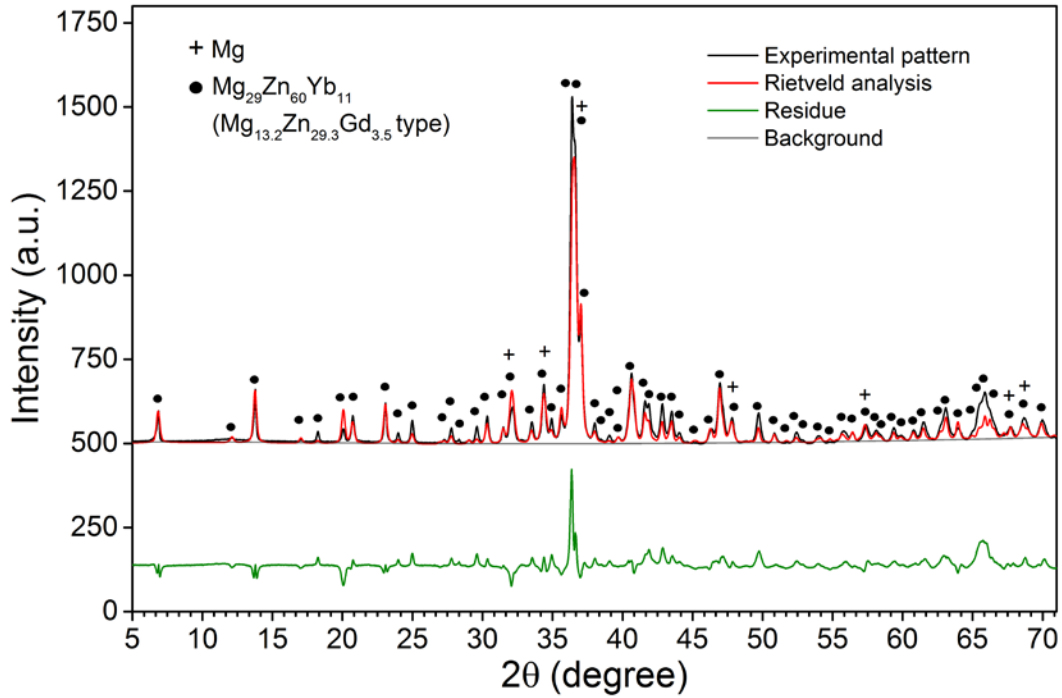

**Fig. S4.** XRD pattern of stable equilibrium state. XRD pattern taken with Cu K $\alpha$  radiation for a Mg<sub>69</sub>Zn<sub>27</sub>Yb<sub>4</sub> alloy solidified at a cooling rate of 20 K/min using DSC. Diffraction peaks are indexed as Mg (hexagonal, P63/mmc, space group 194,  $a=b=3.2107$  Å,  $c=5.2061$  Å) and Mg<sub>13.2</sub>Zn<sub>29.3</sub>Gd<sub>3.5</sub>-type Mg<sub>29</sub>Zn<sub>60</sub>Yb<sub>11</sub> phase (hexagonal, P63/mmc, space group 194,  $a=b=14.8053$  Å,  $c=8.8256$  Å). Rietveld analysis was performed using reference Mg crystal structure (ICDD reference code 04-003-5224,  $a=b=3.2040$  Å,  $c=5.2070$  Å) and Mg<sub>13.2</sub>Zn<sub>29.3</sub>Gd<sub>3.5</sub> crystal structure (ICDD reference code 04-009-2178,  $a=b=14.6330$  Å,  $c=8.7610$  Å).

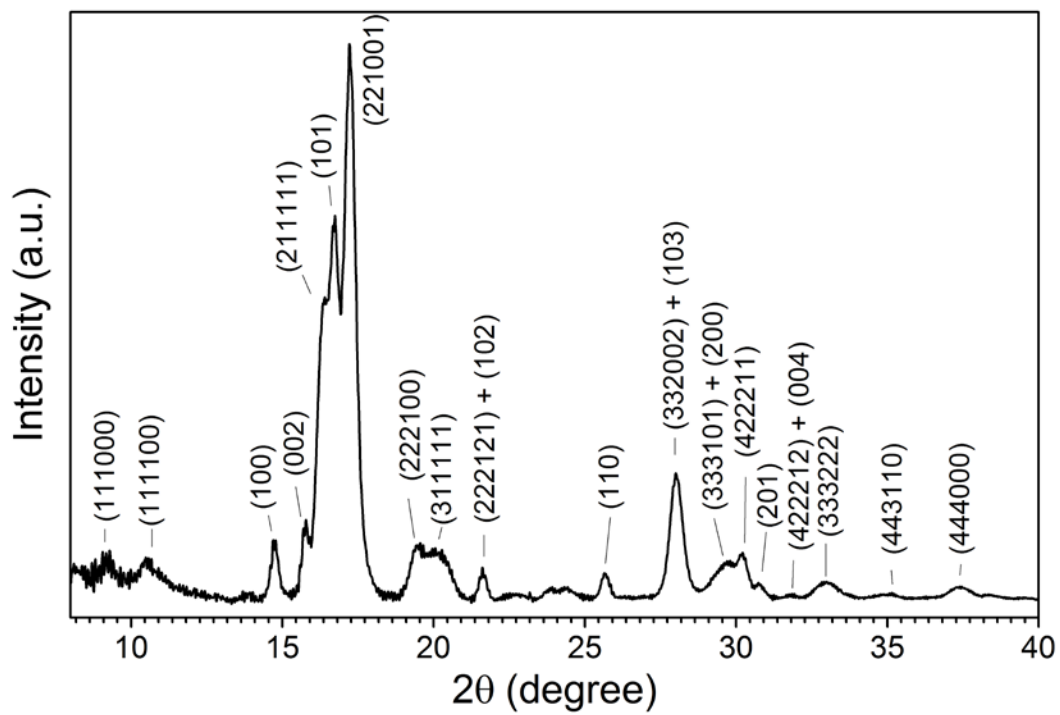

**Fig. S5.** XRD pattern of metastable state. XRD pattern taken with Mo  $K\alpha$  radiation for a  $Mg_{69}Zn_{27}Yb_4$  alloy solidified at a cooling rate of 100 K/s using FDSC. Diffraction peaks are indexed as hexagonal Mg and primitive-type iQC; see Table S1.

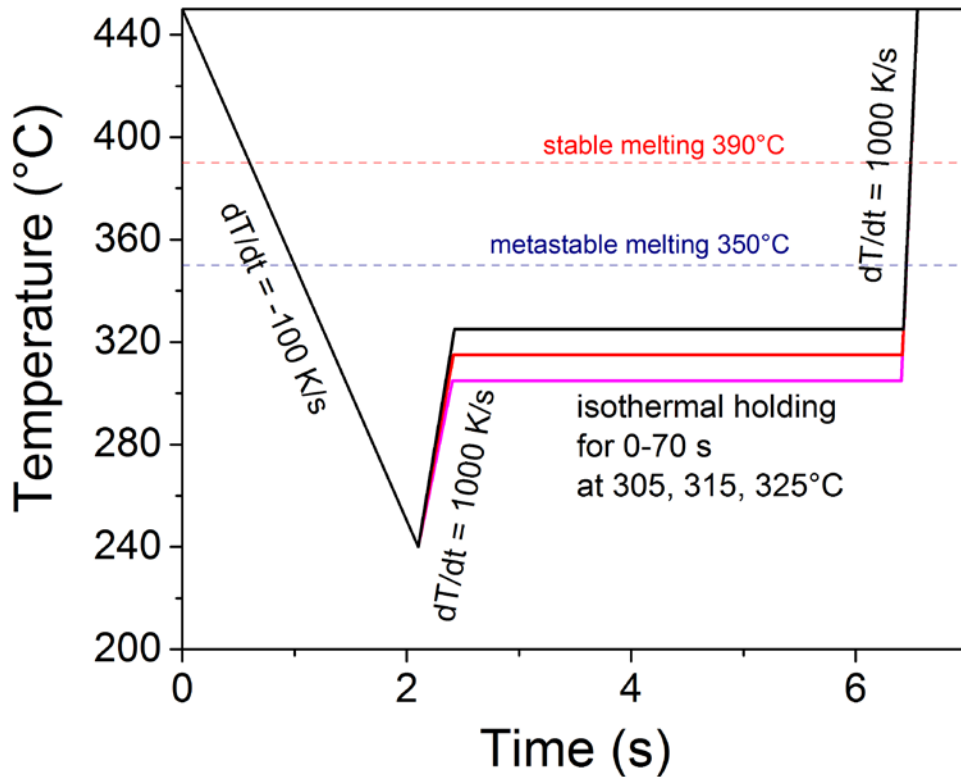

**Fig. S6.** Temperature profiles for studying the metastable-to-stable transition. The effect of temperature and time on the metastable-to-stable phase transition was investigated by designing FDSC experiments using the illustrated temperature profiles.  $\text{Mg}_{69}\text{Zn}_{27}\text{Yb}_4$  melt is solidified at a cooling rate of 100 K/s, which results in formation of metastable QC and Mg phases. Cooling is interrupted at 240°C and the temperature of the metastable solid is increased to isothermal treatment temperatures (305, 315, 325°C) at a rate of 1,000 K/s. The metastable solid is then held at these temperatures for various time intervals (0–70 s), which generates a metastable-to-stable phase transition. Finally, the alloy is melted at a rate of 1,000 K/s.

**Table S1.** XRD peak positions for metastable state. Peak positions ( $2\theta$ ,  $d$ ) and normalized peak intensities of hexagonal Mg and Mg–Zn–Yb primitive-type iQC formed during solidification in FDSC at a rate of 100 K/s, determined from XRD data (see Fig. S5). Peaks for the QC phase are indexed following the work of Elser (7) and distances are calculated using the six-dimensional lattice parameter  $a_{6D} = 7.46\text{\AA}$ .

| Index (QC) | Index (Mg) | $2\theta$ (Mo) | $d_{\text{measured}}(\text{\AA})$ | $d_{\text{calculated}}(\text{\AA})$ | $\Delta d$ (Å) | Intensity |
|------------|------------|----------------|-----------------------------------|-------------------------------------|----------------|-----------|
| (111000)   |            | 9.23           | 4.416                             | 4.425                               | 0.009          | 7         |
| (111100)   |            | 10.49          | 3.888                             | 3.833                               | 0.055          | 7         |
|            | (100)      | 14.74          | 2.771                             |                                     |                | 9         |
|            | (002)      | 15.78          | 2.589                             |                                     |                | 13        |
| (211111)   |            | 16.41          | 2.490                             | 2.491                               | 0.001          | 55        |
|            | (101)      | 16.72          | 2.444                             |                                     |                | 69        |
| (221001)   |            | 17.23          | 2.372                             | 2.369                               | 0.003          | 100       |
| (222100)   |            | 19.46          | 2.103                             | 2.088                               | 0.015          | 9         |
| (311111)   |            | 20.40          | 2.007                             | 2.015                               | 0.008          | 9         |
| (222121)   | (102)      | 21.62          | 1.895                             | 1.882                               | 0.013          | 5         |
|            | (110)      | 25.66          | 1.600                             |                                     |                | 4         |
| (332002)   | (103)      | 28.02          | 1.468                             | 1.464                               | 0.004          | 23        |
| (333101)   | (200)      | 29.72          | 1.386                             | 1.390                               | 0.004          | 7         |
| (422211)   | (112)      | 30.19          | 1.365                             | 1.368                               | 0.003          | 8         |
|            | (201)      | 30.92          | 1.339                             |                                     |                | 5         |
| (422212)   | (004)      | 31.96          | 1.297                             | 1.307                               | 0.010          | 2         |
| (333222)   |            | 32.99          | 1.252                             | 1.243                               | 0.009          | 3         |
| (443110)   |            | 35.00          | 1.182                             | 1.182                               | 0.000          | 1         |
| (444000)   |            | 37.39          | 1.109                             | 1.106                               | 0.002          | 2         |



## References

1. Higashi I, Shiotani N, Uda M, Mizoguchi T, Katoh H (1981) The crystal structure of Mg<sub>51</sub>Zn<sub>20</sub>. *J Solid State Chem* 36(2):225–233.
2. Mitani T, Ishimasa T (2006) A metastable icosahedral quasicrystal in the Zn-Mg-Yb alloy system. *Philos Mag* 86(3–5):361–366.
3. Uchida M, Matsui Y (2002) The pseudocubic approximant Mg<sub>51</sub>Zn<sub>20</sub> interpreted as a modulated crystal. *Philos Mag a Phys Condens Matter Struct Defects Mech Prop* 82(4):831–839.
4. Villars P, Cenzual K eds. Mg<sub>51</sub>Zn<sub>20</sub> Crystal Structure: Datasheet from “PAULING FILE Multinaries Edition – 2012” in SpringerMaterials ([http://materials.springer.com/isp/crystallographic/docs/sd\\_1826458](http://materials.springer.com/isp/crystallographic/docs/sd_1826458)).
5. Villars P, Cenzual K eds. Yb<sub>3</sub>Zn<sub>17</sub> (Zn<sub>73.42</sub>Yb<sub>12.52</sub>) Crystal Structure: Datasheet from “PAULING FILE Multinaries Edition – 2012” in SpringerMaterials ([http://materials.springer.com/isp/crystallographic/docs/sd\\_0251112](http://materials.springer.com/isp/crystallographic/docs/sd_0251112)).
6. Villars P, Okamoto H eds. Mg-Zn Binary Phase Diagram 0-100 at.% Zn: Datasheet from “PAULING FILE Multinaries Edition – 2012” in SpringerMaterials ([http://materials.springer.com/isp/phase-diagram/docs/c\\_0904724](http://materials.springer.com/isp/phase-diagram/docs/c_0904724)).
7. Elser V (1985) Indexing problems in quasicrystal diffraction. *Phys Rev B* 32(8):4892–4898.
